# Supplementary material for: Size matters: relationships between body size and body mass of common coastal, aquatic invertebrates in the Baltic Sea
Source: PeerJ. 2017 Jan 25;5:e2906. doi: 10.7717/peerj.2906 (PMC5270594; doi:10.7717/peerj.2906)
Supplement: Supplemental Information 1 [file peerj-05-2906-s001.xlsx]

## Sheet: Data key
Supplement for Eklöf et al. "Size matters: relationships between body size, dry weight and ash-free dry weight of common coastal, aquatic invertebrates in the Baltic Sea"
Taxa	Latin name of taxa (species, genus or family)
Class
Size	Body length or height (for gastropods) of individuals in mm
DW	gram dry weight per individual
AFDW	gram ash-free dry weight per individual
AFDW:DW	Ash-free dry weight:dry weight, in %

## Sheet: Data
Taxa	Class	Size	DW	AFDW	AFDW:DW
Agraylea spp.	Insecta	4	0.000225	0.000175	77.78
Agraylea spp.	Insecta	5	0.000371429	0.000342857	92.31
Agraylea spp.	Insecta	5	0.000273333	0.00025	91.46
Agraylea spp.	Insecta	5	0.000225	0.0002	88.89
Agraylea spp.	Insecta	6	0.0007	0.000676923	96.7
Agraylea spp.	Insecta	6	0.000736364	0.000702273	95.37
Agraylea spp.	Insecta	6	0.0008	0.00075	93.75
Agraylea spp.	Insecta	6	0.0005	0.000442857	88.57
Agraylea spp.	Insecta	7	0.00095	0.0009	94.74
Agraylea spp.	Insecta	7	0.00145	0.00135	93.1
Agraylea spp.	Insecta	7	0.00085	0.00075	88.24
Amphibalanus improvisus	Crustacea	2	0.00094	9.33333e-05	9.93
Amphibalanus improvisus	Crustacea	2	0.000571429	5e-05	8.75
Amphibalanus improvisus	Crustacea	3	0.00323889	0.000333333	10.29
Amphibalanus improvisus	Crustacea	3	0.002625	0.00022	8.38
Amphibalanus improvisus	Crustacea	4	0.007228	0.000828	11.46
Amphibalanus improvisus	Crustacea	4	0.005735	0.00049	8.54
Amphibalanus improvisus	Crustacea	5	0.0115091	0.00156364	13.59
Amphibalanus improvisus	Crustacea	5	0.0083	0.000716667	8.63
Amphibalanus improvisus	Crustacea	6	0.01776	0.00156	8.78
Amphibalanus improvisus	Crustacea	7	0.0472167	0.00336667	7.13
Amphibalanus improvisus	Crustacea	8	0.08726	0.00636	7.29
Amphibalanus improvisus	Crustacea	9	0.0714	0.0047	6.58
Amphibalanus improvisus	Crustacea	11	0.1255	0.0086	6.85
Bithynia tentaculata	Gastropoda	3	0.002	0.0007	35
Bithynia tentaculata	Gastropoda	4	0.0039	0.0013	33.33
Bithynia tentaculata	Gastropoda	5	0.0160867	0.00312	19.39
Bithynia tentaculata	Gastropoda	5	0.00994546	0.00131818	13.25
Bithynia tentaculata	Gastropoda	6	0.0279	0.00721429	25.86
Bithynia tentaculata	Gastropoda	6	0.0100667	0.00131667	13.08
Bithynia tentaculata	Gastropoda	7	0.0599	0.0114429	19.1
Bithynia tentaculata	Gastropoda	7	0.0155667	0.00208333	13.38
Bithynia tentaculata	Gastropoda	8	0.0736	0.022	29.89
Bithynia tentaculata	Gastropoda	8	0.01295	0.0024	18.53
Bithynia tentaculata	Gastropoda	8	0.06893	0.01125	16.32
Bithynia tentaculata	Gastropoda	9	0.06742	0.0128	18.99
Bithynia tentaculata	Gastropoda	9	0.0629	0.0089	14.15
Bithynia tentaculata	Gastropoda	9	0.0557	0.007	12.57
Bithynia tentaculata	Gastropoda	9	0.0638	0.00792	12.41
Bithynia tentaculata	Gastropoda	10	0.0599	0.0102	17.03
Bithynia tentaculata	Gastropoda	10	0.115767	0.0166833	14.41
Bithynia tentaculata	Gastropoda	10	0.0932	0.0122	13.09
Bithynia tentaculata	Gastropoda	10	0.0785444	0.0101667	12.94
Bithynia tentaculata	Gastropoda	10	0.0902	0.0112	12.42
Bithynia tentaculata	Gastropoda	11	0.0884	0.0154	17.42
Bithynia tentaculata	Gastropoda	11	0.07145	0.0095	13.3
Bithynia tentaculata	Gastropoda	11	0.093	0.0112	12.04
Bithynia tentaculata	Gastropoda	12	0.115	0.0108	9.39
Cardiidae spp.	Bivalvia	1	0.0004	0.0001	25
Cardiidae spp.	Bivalvia	1	0.000247222	4.72222e-05	19.1
Cardiidae spp.	Bivalvia	1	0.000461905	8.09524e-05	17.53
Cardiidae spp.	Bivalvia	1	0.00029	3.75e-05	12.93
Cardiidae spp.	Bivalvia	2	0.000892308	0.000146154	16.38
Cardiidae spp.	Bivalvia	2	0.000855	0.00014	16.37
Cardiidae spp.	Bivalvia	2	0.00204444	0.00025	12.23
Cardiidae spp.	Bivalvia	2	0.00101852	0.000107407	10.55
Cardiidae spp.	Bivalvia	2	0.000726087	7.6087e-05	10.48
Cardiidae spp.	Bivalvia	2	0.00105	0.0001	9.52
Cardiidae spp.	Bivalvia	3	0.0023	0.0005	21.74
Cardiidae spp.	Bivalvia	3	0.0023	0.0005	21.74
Cardiidae spp.	Bivalvia	3	0.0017	0.00027	15.88
Cardiidae spp.	Bivalvia	3	0.00755625	0.00103125	13.65
Cardiidae spp.	Bivalvia	3	0.00257647	0.000258824	10.05
Cardiidae spp.	Bivalvia	4	0.0033	0.0006	18.18
Cardiidae spp.	Bivalvia	4	0.0032	0.00045	14.06
Cardiidae spp.	Bivalvia	4	0.00975333	0.00118667	12.17
Cardiidae spp.	Bivalvia	4	0.00517143	0.000471429	9.12
Cardiidae spp.	Bivalvia	4	0.00453636	0.000363636	8.02
Cardiidae spp.	Bivalvia	5	0.0207846	0.00231539	11.14
Cardiidae spp.	Bivalvia	5	0.0136	0.0012	8.82
Cardiidae spp.	Bivalvia	5	0.0136333	0.00105	7.7
Cardiidae spp.	Bivalvia	5	0.0169812	0.00115625	6.81
Cardiidae spp.	Bivalvia	6	0.0177	0.0023	12.99
Cardiidae spp.	Bivalvia	6	0.0308571	0.00318571	10.32
Cardiidae spp.	Bivalvia	6	0.0219125	0.0015625	7.13
Cardiidae spp.	Bivalvia	6	0.0255143	0.00158571	6.22
Cardiidae spp.	Bivalvia	7	0.040975	0.0040375	9.85
Cardiidae spp.	Bivalvia	7	0.0249125	0.0019375	7.78
Cardiidae spp.	Bivalvia	7	0.031	0.00191	6.16
Cardiidae spp.	Bivalvia	8	0.0753667	0.00776667	10.31
Cardiidae spp.	Bivalvia	8	0.03216	0.00254	7.9
Chironomidae spp.	Insecta	4	8.33333e-05	7.77778e-05	93.33
Chironomidae spp.	Insecta	4	5.2e-05	4.8e-05	92.31
Chironomidae spp.	Insecta	4	2.94118e-05	1.76471e-05	60
Chironomidae spp.	Insecta	5	8.61111e-05	8.05556e-05	93.55
Chironomidae spp.	Insecta	5	0.000136	0.000124	91.18
Chironomidae spp.	Insecta	5	6e-05	5e-05	83.33
Chironomidae spp.	Insecta	6	0.00014	0.000133333	95.24
Chironomidae spp.	Insecta	6	0.00025	0.0002375	95
Chironomidae spp.	Insecta	6	8.18182e-05	7.5e-05	91.67
Chironomidae spp.	Insecta	6	0.000111111	0.0001	90
Chironomidae spp.	Insecta	6	4.33333e-05	3e-05	69.23
Chironomidae spp.	Insecta	7	9.09091e-05	7.27273e-05	80
Chironomidae spp.	Insecta	7	0.000175	0.000125	71.43
Chironomidae spp.	Insecta	7	6.66667e-05	4.66667e-05	70
Chironomidae spp.	Insecta	7	0.0005	0.0003	60
Chironomidae spp.	Insecta	7	0.0003	0.0001	33.33
Chironomidae spp.	Insecta	8	0.0001625	0.0001375	84.62
Chironomidae spp.	Insecta	8	0.0004	0.0003	75
Chironomidae spp.	Insecta	8	9.58333e-05	7.08333e-05	73.91
Chironomidae spp.	Insecta	8	0.0007	0.0005	71.43
Chironomidae spp.	Insecta	9	0.000164706	0.000152941	92.86
Chironomidae spp.	Insecta	9	0.0001625	0.000125	76.92
Chironomidae spp.	Insecta	10	0.00025	0.00023	92
Chironomidae spp.	Insecta	10	0.0007	0.0006	85.71
Chironomidae spp.	Insecta	10	0.0003	0.00025	83.33
Chironomidae spp.	Insecta	10	0.00045	0.00025	55.56
Chironomidae spp.	Insecta	11	0.000433333	0.000366667	84.62
Chironomidae spp.	Insecta	12	0.00025	5e-05	20
Chironomidae spp.	Insecta	13	0.0007	0.000666667	95.24
Chironomidae spp.	Insecta	13	0.000309091	0.000263636	85.29
Chironomidae spp.	Insecta	13	0.0008	0.000633333	79.17
Chironomidae spp.	Insecta	14	0.000273333	0.000226667	82.93
Chironomidae spp.	Insecta	15	0.000333333	0.000277778	83.33
Chironomidae spp.	Insecta	15	0.00085	0.00065	76.47
Chironomidae spp.	Insecta	16	0.001	0.0009	90
Chironomidae spp.	Insecta	16	0.00044	0.00036	81.82
Chironomidae spp.	Insecta	17	0.000266667	0.000233333	87.5
Chironomidae spp.	Insecta	17	0.0011	0.00095	86.36
Gammarus spp.	Crustacea	3	0.000193333	0.000126667	65.52
Gammarus spp.	Crustacea	3	0.00028	0.00018	64.29
Gammarus spp.	Crustacea	3	0.000228571	0.000142857	62.5
Gammarus spp.	Crustacea	4	0.00046	0.00032	69.57
Gammarus spp.	Crustacea	4	0.0004125	0.0002625	63.64
Gammarus spp.	Crustacea	4	0.0006	0.00035	58.33
Gammarus spp.	Crustacea	4	0.000466667	0.00025	53.57
Gammarus spp.	Crustacea	5	0.00151333	0.00102667	67.84
Gammarus spp.	Crustacea	5	0.00055	0.00034	61.82
Gammarus spp.	Crustacea	5	0.0007	0.0004	57.14
Gammarus spp.	Crustacea	5	0.00065	0.000366667	56.41
Gammarus spp.	Crustacea	5	0.0011	0.0006	54.55
Gammarus spp.	Crustacea	6	0.00171333	0.00114	66.54
Gammarus spp.	Crustacea	6	0.0019	0.0012	63.16
Gammarus spp.	Crustacea	6	0.0012	0.00071	59.17
Gammarus spp.	Crustacea	6	0.000975	0.00051875	53.21
Gammarus spp.	Crustacea	7	0.00401333	0.00264667	65.95
Gammarus spp.	Crustacea	7	0.0025	0.0015	60
Gammarus spp.	Crustacea	7	0.00143684	0.000794737	55.31
Gammarus spp.	Crustacea	7	0.00192	0.00106	55.21
Gammarus spp.	Crustacea	8	0.00586923	0.00383077	65.27
Gammarus spp.	Crustacea	8	0.002725	0.00155	56.88
Gammarus spp.	Crustacea	8	0.00272381	0.00154286	56.64
Gammarus spp.	Crustacea	9	0.0035	0.00198947	56.84
Gammarus spp.	Crustacea	9	0.0034	0.00175	51.47
Gammarus spp.	Crustacea	10	0.009825	0.00675	68.7
Gammarus spp.	Crustacea	10	0.00522857	0.00299286	57.24
Gammarus spp.	Crustacea	11	0.010325	0.007075	68.52
Gammarus spp.	Crustacea	11	0.0125	0.0085	68
Gammarus spp.	Crustacea	11	0.00668	0.00398667	59.68
Gammarus spp.	Crustacea	12	0.0111333	0.0068	61.08
Gammarus spp.	Crustacea	12	0.0075	0.00448333	59.78
Gammarus spp.	Crustacea	13	0.01716	0.01138	66.32
Gammarus spp.	Crustacea	13	0.0061	0.0033	54.1
Gammarus spp.	Crustacea	15	0.0053	0.0019	35.85
Gammarus spp.	Crustacea	17	0.02165	0.01335	61.66
Hydrobia spp.	Gastropoda	2	0.000693333	0.000173333	25
Hydrobia spp.	Gastropoda	2	0.0008	0.0002	25
Hydrobia spp.	Gastropoda	2	0.000666667	0.000133333	20
Hydrobia spp.	Gastropoda	2	0.000993333	0.00016	16.11
Hydrobia spp.	Gastropoda	2	0.00116154	0.000180769	15.56
Hydrobia spp.	Gastropoda	2	0.00110417	7.08333e-05	6.42
Hydrobia spp.	Gastropoda	3	0.00282	0.00055	19.5
Hydrobia spp.	Gastropoda	3	0.00178462	0.0003	16.81
Hydrobia spp.	Gastropoda	3	0.002256	0.0003	13.3
Hydrobia spp.	Gastropoda	3	0.00358571	0.000461905	12.88
Hydrobia spp.	Gastropoda	3	0.0024375	0.0001875	7.69
Hydrobia spp.	Gastropoda	3	0.00245333	0.00016	6.52
Hydrobia spp.	Gastropoda	4	0.00404583	0.00071875	17.77
Hydrobia spp.	Gastropoda	4	0.00392667	0.00064	16.3
Hydrobia spp.	Gastropoda	4	0.006005	0.000685	11.41
Hydrobia spp.	Gastropoda	4	0.00440909	0.000363636	8.25
Hydrobia spp.	Gastropoda	4	0.00429333	0.000333333	7.76
Hydrobia spp.	Gastropoda	5	0.006375	0.00103125	16.18
Hydrobia spp.	Gastropoda	5	0.00611667	0.000941667	15.4
Hydrobia spp.	Gastropoda	5	0.00626842	0.000957895	15.28
Hydrobia spp.	Gastropoda	5	0.0101	0.0015	14.85
Hydrobia spp.	Gastropoda	5	0.00803333	0.000791667	9.85
Hydrobia spp.	Gastropoda	6	0.0115	0.0005	4.35
Hydrobia spp.	Gastropoda	8	0.02	0.0015	7.5
Idothea spp.	Crustacea	2	3.07692e-05	2.30769e-05	75
Idothea spp.	Crustacea	2	4.70588e-05	3.52941e-05	75
Idothea spp.	Crustacea	2	2.80702e-05	1.92982e-05	68.75
Idothea spp.	Crustacea	3	5e-05	4.16667e-05	83.33
Idothea spp.	Crustacea	3	0.000109091	8.18182e-05	75
Idothea spp.	Crustacea	3	8.18182e-05	4.54545e-05	55.56
Idothea spp.	Crustacea	5	0.0004	0.0003	75
Idothea spp.	Crustacea	5	0.0007	0.0005	71.43
Idothea spp.	Crustacea	5	0.00034	0.0002	58.82
Idothea spp.	Crustacea	5	0.00035	0.0002	57.14
Idothea spp.	Crustacea	5	0.000338889	0.000161111	47.54
Idothea spp.	Crustacea	6	0.0004	0.0003	75
Idothea spp.	Crustacea	6	0.000775	0.0005	64.52
Idothea spp.	Crustacea	6	0.00054	0.00024	44.44
Idothea spp.	Crustacea	6	0.000614286	0.000257143	41.86
Idothea spp.	Crustacea	7	0.0008	0.0006	75
Idothea spp.	Crustacea	7	0.001	0.0007	70
Idothea spp.	Crustacea	7	0.0024	0.0015	62.5
Idothea spp.	Crustacea	7	0.00094	0.00056	59.57
Idothea spp.	Crustacea	7	0.000746154	0.000323077	43.3
Idothea spp.	Crustacea	8	0.0019	0.0014	73.68
Idothea spp.	Crustacea	8	0.00163333	0.00106667	65.31
Idothea spp.	Crustacea	8	0.00114546	0.000672727	58.73
Idothea spp.	Crustacea	8	0.00101818	0.000427273	41.96
Idothea spp.	Crustacea	9	0.0032	0.0022	68.75
Idothea spp.	Crustacea	9	0.00243333	0.00156667	64.38
Idothea spp.	Crustacea	9	0.0028	0.0017	60.71
Idothea spp.	Crustacea	9	0.00203333	0.00107778	53.01
Idothea spp.	Crustacea	9	0.001475	0.00065	44.07
Idothea spp.	Crustacea	10	0.0026	0.00163333	62.82
Idothea spp.	Crustacea	10	0.00335	0.0021	62.69
Idothea spp.	Crustacea	10	0.00242	0.00133	54.96
Idothea spp.	Crustacea	11	0.0044	0.0029	65.91
Idothea spp.	Crustacea	11	0.0034	0.00198	58.24
Idothea spp.	Crustacea	13	0.00508	0.00286	56.3
Idothea spp.	Crustacea	14	0.0079	0.0055	69.62
Idothea spp.	Crustacea	14	0.00217857	0.00130714	60
Idothea spp.	Crustacea	15	0.00473333	0.00213333	45.07
Idothea spp.	Crustacea	16	0.00556667	0.0027	48.5
Idothea spp.	Crustacea	17	0.0107	0.0072	67.29
Idothea spp.	Crustacea	17	0.0056	0.0032	57.14
Idothea spp.	Crustacea	23	0.0314	0.0205	65.29
Limnephilidae spp.	Insecta	11	0.002	0.0015	75
Limnephilidae spp.	Insecta	12	0.0017	0.0016	94.12
Limnephilidae spp.	Insecta	12	0.0009	0.0008	88.89
Limnephilidae spp.	Insecta	14	0.0036	0.0033	91.67
Limnephilidae spp.	Insecta	15	0.0017	0.0015	88.24
Limnephilidae spp.	Insecta	20	0.00443333	0.00433333	97.74
Limnephilidae spp.	Insecta	20	0.0047	0.0045	95.74
Limnephilidae spp.	Insecta	22	0.0037	0.0036	97.3
Limnephilidae spp.	Insecta	25	0.0072	0.0069	95.83
Limnephilidae spp.	Insecta	27	0.0133	0.0125	93.98
Limecoma balthica	Bivalvia	1	8e-05	3e-05	37.5
Limecoma balthica	Bivalvia	2	0.000644444	0.000144444	22.41
Limecoma balthica	Bivalvia	2	0.0004875	7.5e-05	15.38
Limecoma balthica	Bivalvia	3	0.00123684	0.000242105	19.57
Limecoma balthica	Bivalvia	3	0.00113571	0.000114286	10.06
Limecoma balthica	Bivalvia	4	0.00251429	0.000514286	20.45
Limecoma balthica	Bivalvia	4	0.00275	0.00024	8.73
Limecoma balthica	Bivalvia	5	0.00454286	0.000385714	8.49
Limecoma balthica	Bivalvia	6	0.00835714	0.000871429	10.43
Limecoma balthica	Bivalvia	7	0.01376	0.0013	9.45
Limecoma balthica	Bivalvia	8	0.0251833	0.00191667	7.61
Limecoma balthica	Bivalvia	9	0.0464667	0.0075	16.14
Limecoma balthica	Bivalvia	9	0.0328	0.003	9.15
Limecoma balthica	Bivalvia	10	0.0443167	0.00348333	7.86
Limecoma balthica	Bivalvia	11	0.0536014	0.00178714	3.33
Limecoma balthica	Bivalvia	12	0.07075	0.00525	7.42
Limecoma balthica	Bivalvia	13	0.1086	0.0047	4.33
Limecoma balthica	Bivalvia	15	0.14175	0.015	10.58
Mytilus edulis	Bivalvia	2	0.000522222	3.33333e-05	6.38
Mytilus edulis	Bivalvia	3	0.00137143	0.000228571	16.67
Mytilus edulis	Bivalvia	4	0.00438	0.0006	13.7
Mytilus edulis	Bivalvia	5	0.00668333	0.001	14.96
Mytilus edulis	Bivalvia	6	0.0112	0.0021	18.75
Mytilus edulis	Bivalvia	6	0.0127714	0.00175714	13.76
Mytilus edulis	Bivalvia	7	0.01567	0.00217	13.85
Mytilus edulis	Bivalvia	8	0.02285	0.0029	12.69
Mytilus edulis	Bivalvia	9	0.0276111	0.00355556	12.88
Mytilus edulis	Bivalvia	10	0.03611	0.00495	13.71
Mytilus edulis	Bivalvia	11	0.0451455	0.00598182	13.25
Mytilus edulis	Bivalvia	12	0.04909	0.00631	12.85
Mytilus edulis	Bivalvia	13	0.06276	0.00897	14.29
Mytilus edulis	Bivalvia	14	0.0533727	0.00635454	11.91
Mytilus edulis	Bivalvia	15	0.0893222	0.0131556	14.73
Mytilus edulis	Bivalvia	17	0.12828	0.0204	15.9
Mytilus edulis	Bivalvia	18	0.1411	0.0207	14.67
Mytilus edulis	Bivalvia	19	0.173575	0.031375	18.08
Mytilus edulis	Bivalvia	20	0.170367	0.02865	16.82
Mytilus edulis	Bivalvia	21	0.22572	0.03248	14.39
Mytilus edulis	Bivalvia	22	0.2104	0.0341	16.21
Mytilus edulis	Bivalvia	23	0.32695	0.036525	11.17
Mytilus edulis	Bivalvia	24	0.3985	0.05605	14.07
Mytilus edulis	Bivalvia	27	0.4616	0.0686	14.86
Potamopyrgus antipodarum	Gastropoda	2	0.00102857	0.000164286	15.97
Potamopyrgus antipodarum	Gastropoda	2	0.000867333	0.000127333	14.68
Potamopyrgus antipodarum	Gastropoda	2	0.0010125	8.75e-05	8.64
Potamopyrgus antipodarum	Gastropoda	3	0.00179333	0.000253333	14.13
Potamopyrgus antipodarum	Gastropoda	3	0.001825	0.00019375	10.62
Potamopyrgus antipodarum	Gastropoda	3	0.00194	0.0002	10.31
Potamopyrgus antipodarum	Gastropoda	4	0.0039	0.001	25.64
Potamopyrgus antipodarum	Gastropoda	4	0.00365	0.00075	20.55
Potamopyrgus antipodarum	Gastropoda	4	0.003725	0.000725	19.46
Potamopyrgus antipodarum	Gastropoda	4	0.00465	0.0006125	13.17
Potamopyrgus antipodarum	Gastropoda	4	0.00496	0.0005	10.08
Potamopyrgus antipodarum	Gastropoda	4	0.00506938	0.000488125	9.63
Potamopyrgus antipodarum	Gastropoda	5	0.00525	0.0014	26.67
Potamopyrgus antipodarum	Gastropoda	5	0.0042	0.0009	21.43
Potamopyrgus antipodarum	Gastropoda	5	0.00525	0.0011	20.95
Potamopyrgus antipodarum	Gastropoda	5	0.0051	0.001	19.61
Potamopyrgus antipodarum	Gastropoda	5	0.00826875	0.0009375	11.34
Radix balthica	Gastropoda	1	0.000216667	0.000116667	53.85
Radix balthica	Gastropoda	1	0.000122222	4.44444e-05	36.36
Radix balthica	Gastropoda	2	0.0011	0.0004	36.36
Radix balthica	Gastropoda	2	0.0002875	8.75e-05	30.43
Radix balthica	Gastropoda	2	0.0004	0.000104545	26.14
Radix balthica	Gastropoda	2	0.00053	0.00013	24.53
Radix balthica	Gastropoda	3	0.001	0.00045	45
Radix balthica	Gastropoda	3	0.00132727	0.000318182	23.97
Radix balthica	Gastropoda	3	0.001125	0.00025	22.22
Radix balthica	Gastropoda	3	0.00122125	0.00020875	17.09
Radix balthica	Gastropoda	4	0.00206	0.0006	29.13
Radix balthica	Gastropoda	4	0.00365111	0.000728889	19.96
Radix balthica	Gastropoda	5	0.00748462	0.0015	20.04
Radix balthica	Gastropoda	6	0.0103	0.0038	36.89
Radix balthica	Gastropoda	6	0.00643	0.00148714	23.13
Radix balthica	Gastropoda	7	0.01499	0.00279	18.61
Radix balthica	Gastropoda	8	0.0167075	0.0033325	19.95
Radix balthica	Gastropoda	9	0.0255071	0.00517857	20.3
Radix balthica	Gastropoda	10	0.0338033	0.00550333	16.28
Radix balthica	Gastropoda	11	0.0363	0.0078	21.49
Theodoxus fluviatilis	Gastropoda	1	0.000438462	8.46154e-05	19.3
Theodoxus fluviatilis	Gastropoda	2	0.001	0.0003	30
Theodoxus fluviatilis	Gastropoda	2	0.0007	0.0002	28.57
Theodoxus fluviatilis	Gastropoda	2	0.00126	0.00024	19.05
Theodoxus fluviatilis	Gastropoda	2	0.00237	0.000215	9.07
Theodoxus fluviatilis	Gastropoda	2	0.00126	0.0001	7.94
Theodoxus fluviatilis	Gastropoda	3	0.0052	0.0011	21.15
Theodoxus fluviatilis	Gastropoda	3	0.00325	0.00045	13.85
Theodoxus fluviatilis	Gastropoda	3	0.00361667	0.0005	13.82
Theodoxus fluviatilis	Gastropoda	3	0.00725714	0.000564286	7.78
Theodoxus fluviatilis	Gastropoda	3	0.003225	0.00024	7.44
Theodoxus fluviatilis	Gastropoda	4	0.0081	0.0016	19.75
Theodoxus fluviatilis	Gastropoda	4	0.00888333	0.001	11.26
Theodoxus fluviatilis	Gastropoda	4	0.00737619	0.000790476	10.72
Theodoxus fluviatilis	Gastropoda	4	0.0142929	0.0015	10.49
Theodoxus fluviatilis	Gastropoda	4	0.00717692	0.000546154	7.61
Theodoxus fluviatilis	Gastropoda	5	0.0157	0.0022	14.01
Theodoxus fluviatilis	Gastropoda	5	0.0159	0.0017125	10.77
Theodoxus fluviatilis	Gastropoda	5	0.0254	0.0027	10.63
Theodoxus fluviatilis	Gastropoda	5	0.01744	0.00173	9.92
Theodoxus fluviatilis	Gastropoda	6	0.0242	0.00305	12.6
Theodoxus fluviatilis	Gastropoda	6	0.023625	0.0024625	10.42
Theodoxus fluviatilis	Gastropoda	6	0.0294409	0.00304091	10.33
Theodoxus fluviatilis	Gastropoda	6	0.03393	0.00328	9.67
Theodoxus fluviatilis	Gastropoda	7	0.02508	0.00286	11.4
Theodoxus fluviatilis	Gastropoda	7	0.04625	0.00435	9.41
Theodoxus fluviatilis	Gastropoda	7	0.0403	0.0037	9.18
Theodoxus fluviatilis	Gastropoda	8	0.0585375	0.0055875	9.55
Theodoxus fluviatilis	Gastropoda	9	0.0835	0.0105	12.57
